# Supplementary material for: The TMCrys server for supporting crystallization of transmembrane proteins
Source: Oxford University Press journal article supplement (doi:10.1093/bioinformatics/btz108), 2019-02-19
Supplement: bioinformatics_35_20_4203_s1.pdf [file bioinformatics_35_20_4203_s1.pdf]

# Supplementary Figures for

## The TMCrys server for supporting crystallization of transmembrane proteins

Julia K. Varga and Gábor E. Tusnády\*

\*"Momentum" Membrane Protein Bioinformatics Research Group, Institute of Enzymology, Research Center of Natural Sciences, Hungarian Academy of Sciences, H-1117 Budapest, Magyar tudósok körútja 2.

|                              |   |
|------------------------------|---|
| Supplementary Figure 1. .... | 2 |
| Supplementary Figure 2. .... | 3 |

Supplementary Figure 1.

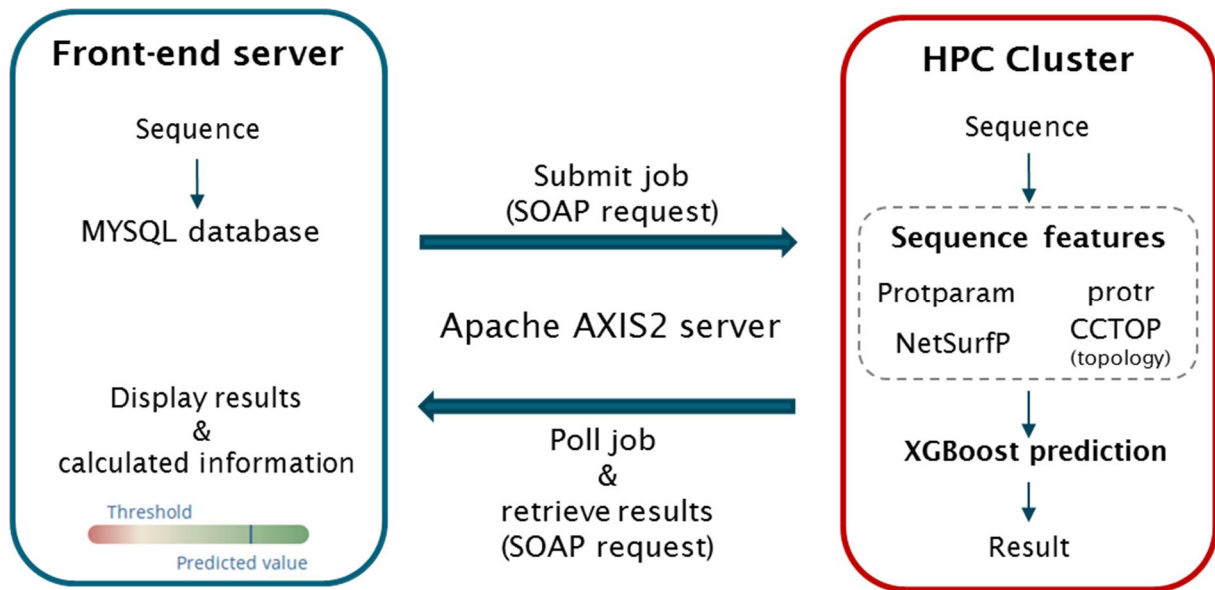

**Overview of the server.** The submitted sequence is stored in a MYSQL database. The HPC (high performance computing) cluster and the frontend server communicates via SOAP requests by an Apache AXIS2 server. Once the sequence arrives on the cluster, features are calculated by running several programs and scripts, then fed into an R script that makes the XGBoost prediction. The process is monitored by the AXIS2 server and once finished, the results are sent back to the front-end server, stored in the MYSQL database and displayed.
